# Supplementary material
Source: Elsevier journal article supplement (https://www.sciencedirect.com/science/article/pii/S2254887420301338)
Supplement: mmc1 [file S2254887420301338:mmc1.doc]

Refers to RCE_1862

Original

Frecuencia, perfil y resultados de los pacientes con insuficiencia cardiaca aguda que ingresan directamente en hospitalización a domicilio desde urgencias

Frequency, profile, and outcomes of patients with acute heart failure transferred directly to home hospitalization from emergency departments

# Introduction

Acute heart failure (AHF) is one of the main causes of hospitalization in Spain1 and is responsible for one of the largest economic and healthcare burdens on any public health system.2,3 It is associated with high in-hospital mortality and high readmission rates following discharge.4 In Spain, like in many countries with public health systems, the great majority of patients with AHF are initially treated in hospital emergency departments (HED) and nearly three-fourths of them are hospitalized. Given the multidisciplinary nature of the medical care for this syndrome, many departments receive patients with AHF and general medicine departments are those that admit the vast majority of them.5

For more than a decade, home hospitalization (HH) has been an alternative to conventional hospitalization that makes it possible to provide the same level of care, but in the patient’s home. This option allows for in-person monitoring by physicians and nurses, performing certain additional tests, and administering intravenous medication. A meta-analysis has demonstrated that HH increases the time to readmission, reduces costs, and improves quality of life in patients with AHF who require hospital admission.6 The majority of these outcomes come from studies that select patients both in emergency departments and in conventional wards or clinics.6 In recent years, there has been growing use of HH in patients transferred directly from HED after a few hours of observation and without prior conventional hospitalization. Therefore, this work aims to study the frequency, profile, and short-term outcomes of patients with AHF transferred to HH and compare them to those hospitalized in short-stay units (SSU) and internal medicine wards (IM).

# Methods

The EAHFE (*Epidemiology of Acute Heart Failure in Emergency departments)* Registry is a multipurpose, multicentric prospective cohort study that includes 18,370 patients. It has had six patient enrollment phases to date in which 45 Spanish HED have participated (13% of the 339 public hospitals, including university, referral, and regional hospitals). Specific details on the EAHFE Registry have been published in previous studies.5–8

This work is an exploratory study that selected patients in the registry from hospitals that had transferred patients with AHF directly to HH following care in the emergency department. Only the EAHFE-4 (2014), EAHFE-5 (2016), and EAHFE-6 (2018) registries were analyzed, given that the EAHFE cohorts 1-3 did not gather this information systematically (see Appendix B additional material, in the annex, in which the characteristics of patients in EAHFE 1-3 are compared to those of patients in EAHFE 4-6). In general, the HH admission criteria include elderly patients with decompensated chronic heart failure (CHF) who are not candidates for interventions or whose CHF is not of coronary origin; have comorbidities, frailty, functional limitation, or are in the palliative and/or terminal phase; are respiratorily and hemodynamically stable upon discharge; and have adequate social support and the possibility for optimal outpatient follow-up. SSU admission criteria include patients with intermediate- or low-risk decompensated CHF with nonsevere triggering factors, who are respiratorily and hemodynamically stable with at least a partial response to immediate treatment, who do not require complex diagnostic or therapeutic procedures, and who are likely to recover in a short period of time (48 – 72 hours). IM admission criteria include elderly patients with decompensated CHF who are not candidates for interventions; whose CHF is not of coronary origin; who have signs of significant comorbidity that could interfere with treatment; who have comorbidities, frailty, functional limitation, or social problems; as well as patients in the terminal phase.9 *A priori*, the authors interpreted that patients hospitalized in SSU or IM—though the two groups are not comparable between themselves—were clear candidates for HH if they met the respiratory and hemodynamic stability criteria, did not require monitoring or the study or treatment of the triggering and/or etiological factor, and had adequate outpatient support. In fact, had there not been HH in these centers, patients in HH would have possibly been admitted to these care areas.

The independent variables collected included data on demographics, comorbidities, chronic treatment for heart failure, baseline functional condition, severity of the decompensation episode, most frequent triggering factors, treatment administered in the emergency department, and duration of hospitalization. To calculate patients’ risk, three different risk stratification scales were used: the MEESSI-AHF scale,7,8 calculated for patients with AHF in the emergency department and which estimates 30-day mortality; the GWTG-HF scale,10 calculated for patients hospitalized due to AHF and which estimates in-hospital mortality; and the EFFECT scale,11 calculated for patients hospitalized with AHF and which estimates 30-day and 1-year mortality.

The outcome variables analyzed included all-cause mortality during the first year from the index event and the composite outcome (readmission to the emergency department or hospitalization and death due to any cause) in the 30 days following discharge in patients who survived the episode.

Qualitative variables are expressed as frequencies and percentages and quantitative variables as means and standard deviation (SD) or as medians and interquartile range (IQR) if they did not follow a normal distribution. Groups were compared using the chi-square test for qualitative variables and the one-way ANOVA test for independent samples for quantitative variables or the Kruskal-Wallis test if they were not normal. Comparisons were made between the group of patients in HH and each of the two independent control groups. The relationship between the place of admission and the different adverse events studied was analyzed by means of a Cox regression model for estimating the proportional risk of patients in HH versus those hospitalized in SSU and IM. The magnitude of the effect was quantified as a hazard ratio (HR) with a 95% confidence interval (95% CI). The calculation was adjusted for independent variables that were statistically significant among the three groups on the overall comparison. Given that there were missing values for some of them, prior to performing the Cox regression, five new sets of data were created in which the missing values were substituted using the multiple imputation method. Statistical significance was defined as a *p* value less than .05 or when the 95% CI of the HR excluded the value of 1. The analyses were performed using the SPSS 24 program (IBM, New Castle, NY, USA).

# Results

Six hospitals were identified in which 68 patents were transferred directly from the emergency department to HH (22 from the Clinical Hospital of Barcelona, 13 from the Dr. Peset Hospital of Valencia, 12 from the Marqués de Valdecilla Hospital of Santander, 9 from the Terrassa Hospital, and six each from the General Hospital of Alicante and the Infanta Leonor Hospital of Madrid). During the study period, these hospitals admitted 979 patients in IM and 384 in SSU (the only hospital without an SSU was the Clinical Hospital of Barcelona), which constituted groups 1 and 2, respectively (fig. 1 fig. 1).

The frequency of HH was 4.7% (95% CI = 3.8% – 6.0%). Patients transferred to HH were elderly and had a high degree of comorbidity. Compared to patients admitted to IM, the only difference was that those admitted to HH had a lower left ventricular ejection fraction. Compared to patients admitted to the SSU, HH patients had a lower left ventricular ejection fraction, worse baseline functional class, and received oxygen therapy in the emergency department more frequently. The remaining comparisons showed no significant differences (table 1 table 1).

Mortality during hospitalization in HH patients was 1.5% (one death), significantly lower than among those admitted to IM (11.8%; *p* = .008) and closer to those hospitalized in SSU (4.7%; *p* = .223). The mean duration of HH was 7.5 days (IQR = 4.5 – 12), similar to what was observed in IM (median = 8; IQR = 5 – 13; *p* = .106) and greater than what was observed in SSU (median = 4; IQR = 3 – 7; *p* < .001). All-cause mortality at one year in patients in HH did not differ with respect to either of the 2 comparator groups after adjusting for variables with an unequal distribution among the 3 groups overall (age, previous AHF episodes, chronic treatment with beta blockers, NYHA functional class, left ventricular ejection fraction, and severity of the episode according to the MEESSI scale). However, it was observed that readmission to the emergency department during the 30 days following discharge was significantly lower in the HH group, both with respect to the IM (HR = 0.50, 95% CI = 0.25 – 0.97) and the SSU groups (HR = 0.37; 95% CI = 0.19 – 0.74). There were no differences in the need for readmission or 30-day mortality following discharge. The pooled event rate at 30 days following discharge was significantly lower compared to the group of patients hospitalized in SSU (HR = 0.52, 95% CI = 0.29 – 0.92) (fig. 2 fig. 2).

# Discussion

The first relevant finding of our study is the small number of centers participating in the registry which transfer patients directly to HH from the emergency department. In addition, among centers who use this healthcare resource, the rate of transfer to HH directly from the emergency department is low, despite the fact that the outcomes achieved in HH are very similar and, in some aspects, even better than those obtained by admitting the patient to the hospital. In this sense, it should be noted that readmission to the emergency department was significantly lower than what was documented in hospitalized patients. Previous observational and quasiexperimental studies have also shown that transferring patients with AHF to HH from the emergency department decreases repeat visits to the emergency department.12,13

A period of vulnerability in the first 90 – 180 days following a decompensation episode has been described in which patients are more susceptible to adverse outcomes such as repeat visits and/or readmission.14 It is known that the length of hospital stay,15 education on self-care,16 evidence-based treatment optimization and degree of adherence,17 transition, and close monitoring after discharge are key to short-term outcomes.16–18 In this sense, HH could be a good option for patients with AHF who suffer from a period of decompensation who are hemodynamically stable and who do not need complex diagnostic or therapeutic procedures given that it allows for close monitoring of the process over a prolonged period of time without increasing the risk of adverse events linked to the hospital as well as a progressive titration of medication, education on self-care for the patient and caregiver, and transition of care with the healthcare professionals in charge of the process in the community setting. Therefore, HH must not only be seen as an alternative in competition with conventional hospitalization, and more specifically with SSU, but rather as a unit that allows for an intermediate care transition between the hospital and the community that makes the early discharge of frail patients with AHF who have good social support possible.

The second notable outcome was that patients in HH did not differ in any clinically relevant way from patients admitted to the hospital, although patients admitted to SSU had statistically significant lower risk according to the MEESSI-AHF scale, better functional class, and greater ejection fraction. In this regard, this work does not allow for establishing the clinical reasons behind why the frequency of transfer to HH directly from emergency departments was so low. It is known that one of the main admission criteria for HH is determined by the family situation and social support network.19 Consequently, the decision to transfer a patient to HH or not could be more related to these circumstances than to purely clinical aspects, such as the patient profile or risk of the episode. In fact, in line with previous studies, this work adds to the body of evidence showing that HH is a safe alternative to conventional hospitalization in terms of mortality.6,20,21 On the other hand, it should be noted that unmeasured social support could have an effect on aspects related to self-care and justify the outcomes found in terms of repeat visits. To date, it is known that living alone is associated with worse outcomes,22 that at-home visits have been demonstrated to reduce readmissions18 by means of improved recognition of symptoms and adherence to pharmacological treatment and self-care recommendations,18,23 and that caregiver education could reduce hospitalizations.24

This study has important limitations. First, it is an exploratory study carried out on a series of HED selected according to convenience to form part of the EAHFE registry that had patients with AHF transferred directly from the emergency department to HH. Second, the decision to admit patients to HH was made at the discretion of the attending physician in consensus with the patient and caregiver, thus there were no unified criteria among the different centers. Third, there are unmeasured variables in this work that could have had an influence on the outcomes, such as the time spent in the emergency department prior to transfer to HH,15 the presence and stage of frailty in the patient,25,26 the degree of evidence-based treatment optimization and adherence,17 the education provided and capacity to carry out self-care recommendations,27 family support and the social support network,19 the number of visits made during HH, and the type of outpatient follow-up after discharge from HH or the hospital.18 Lastly, there were results that were not included in the registry that would have been of interest, such as the number of complications during hospitalization, the degree of functional deterioration, or the impact on quality of life.

In conclusion, the transfer of patients with AHF directly to HH from HED is not frequent, despite the fact that it could be as safe an option as hospitalization in general medical departments such as SSU or conventional IM. Future studies are needed to demonstrate whether HH is more or less effective, safe, and cost-effective as a multidimensional program of close, early follow-up in patients with AHF discharged from emergency departments.28,29

# Funding

This study has been possible thanks in part to the PPI15/01019, PI15/00773, PI11/01021, and PI10/01918 grants from the Carlos III Institute of Health from funds from the Ministry of Health, Social Services, and Equality (MSSSI, for its initials in Spanish) and the European Regional Development Fund (ERDF); grants from the Regional Government of Catalonia for Consolidated Research Groups (GRC 2009/1385 and 2014/0313); and the La Marató grant from TV3 (20152510).

# Conflicts of interest

The ICA-SEMES group has received unconditioned financial support from Orion-Pharma, Otsuka, and Novartis España.

1. [{(Annex 1)}] Remaining members of the ICA-SEMES group

Marta Fuentes, Cristina Gil (Hospital Universitario de Salamanca), Héctor Alonso, Enrique Pérez-Llantada (Hospital Marqués de Valdecilla de Santander), Francisco Javier Martín-Sánchez, Guillermo Llopis García, Mar Suárez Cadenas, Beatriz Angós, Eduardo Cardassay, Enrique del Toro y Alejandro Puente (Hospital Clínico San Carlos de Madrid), Òscar Miró, Víctor Gil, Rosa Escoda, Carolina Xipell, Carolina Sánchez (Hospital Clínic de Barcelona), María José Pérez-Durá, Eva Salvo (Hospital Politècnic La Fe de Valencia), José Pavón (Hospital Dr. Negrín de Las Palmas de Gran Canaria), Antonio Noval (Hospital Insular de Las Palmas de Gran Canaria), José Manuel Torres (Hospital Reina Sofía de Córdoba), María Luisa López-Grima, Amparo Valero, María Ángeles Juan (Hospital Dr. Peset de Valencia), Alfons Aguirre, Maria Angels Pedragosa, Silvia Mínguez Masó (Hospital del Mar de Barcelona), María Isabel Alonso, Francisco Ruiz (Hospital de Valme de Sevilla), José Miguel Franco (Hospital Miguel Servet de Zaragoza), Ana Belén Mecina (Hospital de Alcorcón de Madrid), Josep Tost, Marta Berenguer, Ruxandra Donea (Consorci Sanitari de Terrassa), Susana Sánchez Ramón, Virginia Carbajosa Rodríguez (Hospital Universitario Río Hortega de Valladolid), Pascual Piñera, José Andrés Sánchez Nicolás (Hospital Reina Sofía de Murcia), Raquel Torres Garate (Hospital Severo Ochoa de Madrid), Aitor Alquézar-Arbé, Miguel Alberto Rizzi, Sergio Herrera (Hospital de la Santa Creu i Sant Pau de Barcelona), Javier Jacob, Alex Roset, Irene Cabello, Antonio Haro (Hospital Universitari de Bellvitge de Barcelona), Fernando Richard, José María Álvarez Pérez, María Pilar López Diez (Hospital Universitario de Burgos), Pablo Herrero Puente, Joaquín Vázquez Álvarez, Belén Prieto García, María García García, Marta Sánchez González (Hospital Universitario Central de Asturias de Oviedo), Pere Llorens, Patricia Javaloyes, Víctor Marquina, Inmaculada Jiménez, Néstor Hernández, Benjamín Brouzet, Begoña Espinosa, Adriana Gil (Hospital General de Alicante), Juan Antonio Andueza (Hospital General Universitario Gregorio Marañón de Madrid), Rodolfo Romero (Hospital Universitario de Getafe de Madrid), Martín Ruíz, Roberto Calvache (Hospital de Henares de Madrid), María Teresa Lorca Serralta, Luis Ernesto Calderón Jave (Hospital del Tajo de Madrid), Beatriz Amores Arriaga, Beatriz Sierra Bergua (Hospital Clínico Lozano Blesa de Zaragoza), Enrique Martín Mojarro, Brigitte Silvana Alarcón Jiménez (Hospital Sant Pau i Santa Tecla de Tarragona), Lisette Travería Bécquer, Guillermo Burillo (Hospital Universitario de Canarias de Tenerife), Lluís Llauger García, Gerard Corominas LaSalle (Hospital Universitari de Vic de Barcelona), Carmen Agüera Urbano, Ana Belén García Soto, Elisa Delgado Padial (Hospital Costa del Sol de Marbella de Málaga), Ester Soy Ferrer, María Adroher Muñoz (Hospital Josep Trueta de Girona). José Manuel Garrido (Hospital Virgen Macarena de Sevilla), Francisco Javier Lucas-Imbernón (Hospital General Universitario de Albacete), Rut Gaya (Hospital Juan XXIII de Tarragona), Carlos Bibiano, María Mir, Beatriz Rodríguez (Hospital Infanta Leonor de Madrid), José Luis Carballo (Complejo Hospitalario Universitario de Ourense), Esther Rodríguez-Adrada, Belén Rodríguez Miranda, Monika Vicente Martín (Hospital Rey Juan Carlos de Móstoles de Madrid), Pere Coma Casanova, Joan Espinach Alvarós (Hospital San Joan de Déu de Martorell, Barcelona).

1. [{(Annex)}] Additional material

Additional material for this article can be consulted in its electronic version available at <doi:10.1016/j.rce.2020.02.007>.

1. [{(Annex A)}] Additional material

mmc1

Bibliography

Figure 1 Patient inclusion flowchart. gr1

| Registros EAHFE N = 18.370 | EAHFE Registries N = 18,370 |
| --- | --- |
| 5.845 procedentes de los registros EAHFE 1-2-3 (uso de hospitalización a domicilio testimonial) | 5,845 from EAHFE Registries 1-2-3 (token use of home hospitalization) |
| Registro EAHFE 4-5-6 N = 12.525 | EAHFE Registries 4-5-6 N = 12,525 |
| 9.400 procedentes de hospitales sin ingresos directos desde urgencias a hospitalización a domicilio | 9,400 from hospitals without direct transfers to home hospitalization from the emergency department |
| 6 hospitales con ingresos directos desde urgencias a hospitalización a domicilio N = 3.125 | 6 hospitals with direct transfers to home hospitalization from the emergency department N = 3,125 |
| 946 ingresos en otros servicios o unidades | 946 admissions to other departments or units |
| 748 no ingresan | 748 not admitted |
| Grupo a Estudio: Ingresos en hospitalización a domicilio N = 68 | Study group: Admissions to home hospitalization N = 68 |
| Grupo Control 1: Ingresos en medicina interna N = 979 | Control group 1: Admissions to internal medicine wards N = 979 |
| Grupo control 2: ingresos en corta estancia N = 384 | Control group 2: Admissions to short-stay units N = 384 |

Figure 2 Proportional risk curves for all-cause mortality at one year (top) and adverse events during the month following hospital discharge for patients admitted to home hospitalization, internal medicine wards, and short-stay units. The hazard ratios correspond to estimates for the home hospitalization group with respect to the other two groups adjusted for differences (age, prior episodes of acute heart failure, chronic treatment with beta blockers, NYHA functional class, left ventricular ejection fraction, and episode severity stratification according to the MEESSI scale). gr2

| Mortalidad a un año tras el evento índice | One-year mortality following the index event |
| --- | --- |
| Riesgos proporcionales | Proportional risk |
| Tiempo desde el evento índice (días) | Time since the index event (days) |
| hospitalización en domicilio | Home hospitalization |
| hospitalización en medicina interna | Internal medicine ward hospitalization |
| hospitalización en corta estancia | Short-stay unit hospitalization |
| Eventos adversos durante el mes posterior al alta | Adverse events during the month following discharge |
| Reconsulta a urgencias | Emergency department readmission |
| hospitalización | Hospitalization |
| Muerte | Death |
| Evento combinado | Combined event |

Table 1 Comparison of patient characteristics based on different hospitalization units

|  | HH  N = 68  n (%) | IM  N = 979  n (%) | SSU  N = 384  n (%) | *p* |
| --- | --- | --- | --- | --- |
| [0.1-5]**Epidemiological data** | | | | |
| *Age > 80 years* | 83 (10) | 83 (9) | 85 (8) | **.001** |
| *Female sex* | 35 (51.5) | 596 (60.9) | 245 (63.8) | .146 |
| [0.1-5] | | | | |
| [0.1-5]***Comorbidities*** | | | | |
| *Hypertension* | 55 (80.9) | 850 (86.8) | 326 (84.9) | .298 |
| *Diabetes mellitus* | 23 (33.8) | 433 (44.2) | 165 (43.0) | .242 |
| *Ischemic cardiopathy* | 19 (27.9) | 226 (23.1) | 99 (25.8) | .429 |
| *Chronic kidney disease (creatinine > 2 mg/dL)* | 27 (39.7) | 304 (31.1) | 112 (29.2) | .221 |
| *Cerebrovascular disease* | 7 (10.3) | 107 (10.9) | 47 (12.2) | .764 |
| *Atrial fibrillation* | 30 (40.1) | 450 (46.0) | 197 (51.3) | .179 |
| *Valvular heart disease* | 15 (22.1) | 198 (20.2) | 76 (19.8) | .911 |
| *Peripheral artery disease* | 7 (10.3) | 69 (7.0) | 27 (7.0) | .599 |
| *Chronic obstructive pulmonary disease* | 21 (30.9) | 270 (27.6) | 89 (23.2) | .180 |
| *Previous episodes of acute heart failure* | 51 (75.0) | 679 (69.4) | 291 (75.8) | **.049** |
| [0.1-5] | | | | |
| [0.1-5]**Chronic at-home treatment** | | | | |
| *Beta blockers* | 35 (51.5) | 401 (41.0) | 188 (49.0) | **.011** |
| *Renin-angiotensin-aldosterone system inhibitors* | 38 (55.9) | 494 (50.5) | 208 (54.2) | .365 |
| *Mineralocorticoid receptor antagonist* | 8 (8.8) | 129 (13.2) | 64 (16.7) | .114 |
| *Digoxin* | 6 (8.8) | 107 (10.9) | 30 (7.8) | .214 |
| [0.1-5] | | | | |
| [0,1-5]**Baseline condition** | | | | |
| *NYHA class III/IV*1 | 23 (34.8)a | 309 (33.1) | 78 (21.0) | **< .001** |
| *Barthel index (points) [mean (SD)]*2 | 70 (28) | 73 (26) | 75 (26) | .417 |
| *LVEF (%)[mean (SD)]*3 | 48 (14)a,b | 53 (14) | 56 (13) | **.001** |
| [0.1-5] | | | | |
| [0.1-5]**Most frequent triggering factors** | | | | |
| *Infection* | 32 (47.1) | 436 (47.2) | 166 (44.4) | .644 |
| *Hypertensive episode* | 6 (8.8) | 58 (6.3) | 24 (6.4) | .710 |
| *Anemia* | 3 (4.4) | 65 (7.0) | 30 (8.0) | .545 |
| *Atrial fibrillation with rapid ventricular response* | 6 (8.8) | 119 (2.9) | 50 (13.4) | .584 |
| *Medication noncompliance* | 1 (1.5) | 41 (4.4) | 6 (4.3) | .504 |
| *Acute coronary syndrome* | 0 (0.0) | 19 (2.0) | 5 (1.3) | .374 |
| [0.1-5] | | | | |
| [0.1-5]**Emergency department treatment** | | | | |
| *Oxygen therapy* | 58 (86.6)a | 815 (84.2) | 283 (74.1) | **< .001** |
| *Noninvasive ventilation* | 7 (10.4) | 105 (10.8) | 32 (8.4) | .399 |
| *Intravenous loop diuretics in boli* | 64 (95.5) | 883 (91.2) | 336 (88.0) | .066 |
| *Intravenous loop diuretics in perfusion* | 3 (4.5) | 9 (0.9) | 2 (0.5) | **.010** |
| *Intravenous nitroglycerin* | 4 (6.0) | 82 (8.5) | 31 (8.1) | .767 |
| [0.1-5] | | | | |
| [0.1-5]**Severity of the decompensation episode** | | | | |
| *MEESSI scale (30-day mortality in the emergency department)*4 |  |  |  | **.036** |
| Low risk | 13 (31.7) | 172 (27.1) | 108 (36.0) |  |
| Intermediate risk | 20 (48.8) | 304 (47.9) | 138 (46.0) |  |
| High/very high risk | 8 (19.5) | 159 (25.0) | 54 (18.0) |  |
| *GWTG Scale (in-hospital mortality in hospitalized patients)*5 |  |  |  | .460 |
| Low risk (< 5%) | 2 (5.3) | 44 (6.1) | 25 (6.9) |  |
| Intermediate risk (5 – 10%) | 26 (68.4) | 414 (57.7) | 223 (61.4) |  |
| Very high risk (> 10%) | 10 (26.3) | 260 (36.2) | 115 (31.7) |  |
| *EFFECT scale (30-day mortality in hospitalized patients)*6 |  |  |  | .570 |
| Very low/low risk | 4 (13.8) | 51 (9.6) | 25 (7.7) |  |
| Intermediate risk | 13 (44.8) | 197 (37.0) | 127 (39.0) |  |
| High/very high risk | 12 (41.4) | 285 (53.5) | 174 (53.4) |  |

a*p* < .05 for the comparison of patients admitted directly to home hospitalization with respect to group 2 (short-stay unit);

b*p* < .05 for the comparison of patients admitted directly to home hospitalization with respect to group 1 (Internal Medicine).

The *p* values in bold indicate those that are statistically significant (*p* < .05).

161 patients (4.3%) with missing values; 273 patients (5.1%) with missing values; 3610 patients (42.6%) with missing values; 4455 patients (31.8%) with missing values; 5312 patients (21.8%) with missing values; 6543 patients (37.9%) with missing values.

**Abbreviations:** SD: standard deviation; LVEF: left ventricular ejection fraction; HH: home hospitalization; IM: Internal Medicine; SSU: short-stay unit.
